# Supplementary material
Source: ML conference proceedings conference paper supplement (https://openreview.net/forum?id=X6mpiUEWPe)
Supplement: supplementary_material [file teaser.pdf › supp/code(part)/Readme_images/teaser.pdf]

## Performance of Table-LLaVA on a seen task

| December 31                                       |          |          |
|---------------------------------------------------|----------|----------|
|                                                   | 2019     | 2018     |
| U.S. \$ in thousands                              |          |          |
| Operating loss carryforward                       | 73,260   | 57,768   |
| Net deferred tax asset before valuation allowance | 19,911   | 15,916   |
| Valuation allowance                               | (19,911) | (15,916) |
| Net deferred tax asset                            | 795      | 772      |

**Instruction:** With reference to the depicted table, kindly offer a succinct answer to the following question. What was the operating loss carryforward amount in 2019 and 2018 respectively?

**Output:** According to the table, the final answer is {"answer":["\$","\$"]}.

Failed to process complex row and column information

## Performance of Table-LLaVA on an unseen task

| Host          | Number of episodes | First hosted        | Last hosted       |
|---------------|--------------------|---------------------|-------------------|
| Fred Armisen  |                    | 1 May 21, 2016      | May 21, 2016      |
| Dan Aykroyd   |                    | 1 May 17, 2003      | May 17, 2003      |
| Dana Crvey    |                    | 4 October 22, 1994  | February 5, 2011  |
| Chevy Chase   |                    | 8 February 18, 1978 | February 15, 1997 |
| Billy Crystal |                    | 2 March 17, 1984    | May 12, 1984      |

**Instruction:** Please review the table image, identify the spelling error in the first column, fourth row, and return a corrected result.

**Output:** Therefore, The spelling error in the first column is "May,21,2016",it should be "May,21,2016".

Failed to locate and correct

## MMTab—with Errors

|                                                     | 2013       | 2010       |
|-----------------------------------------------------|------------|------------|
| donor rate                                          |            |            |
| total population                                    | 29,188     | 28,206     |
| total number of donors                              | 24,051     | 23,736     |
| donor rate                                          | 82         | 84         |
| amount of donations                                 |            |            |
| total amount                                        | 12,763,566 | 11,158,712 |
| average annual amount per donors                    | 531        | 470        |
| amount of donations by type of organization         |            |            |
| total amount donated to religious organizations     | 5,227,931  | 4,481,629  |
| total amount donated to non-religious organizations | 7,535,634  | 6,677,084  |

**Instruction:** What was the total amount of donations by canadians to charitable or non-profit organizations increased between 2010 and 2013?

**Output:** According to this excel table, the final answer is {"answer": ["12763566.0"]}.

some answers are wrong

## MMTab—vague

| Carl lorenz |                   |             |                  |
|-------------|-------------------|-------------|------------------|
| name        | Carl lorenz       | death_date  | 25 november 1993 |
| birth_date  | 27 november 1913  | death_place | Berlin, germany  |
| birth_place | Chemnitz, germany | updated     | 14 july 2014     |

**Instruction:** Based on the Wikipedia infobox table regarding 'Carl lorenz', generate a biography for this person.

Lack of contextual guidance results in responses that, although correct, lack information density and practical value.

## Our Solution

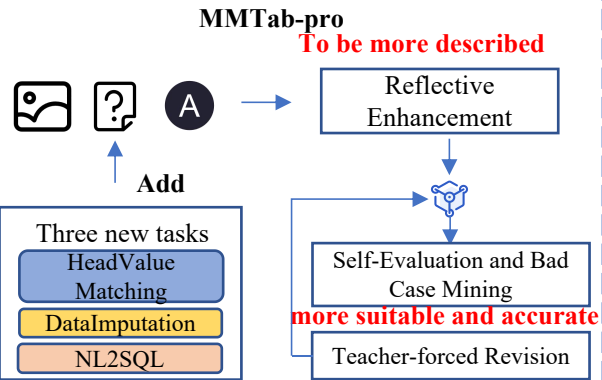

## Performance of TabX on a seen task

**Output:** The values "73,260" and "57,768" are listed under the "Operating loss carryforward" row for the years 2019 and 2018 respectively. Thus, the final answer is {"answer": ["73,260", "57,768"]}.

Correct answer!

## Performance of TabX on an unseen task

**Output:** The spelling error in the first column is "Dana Crvey", it should be "Dana Crane".

Correctly locate!
